# 1 MINUUR: Microbial INsight Using Unmapped Reads

2  
3 Aidan Foo<sup>1</sup>, Louise Cerdeira<sup>2</sup> Grant L. Hughes<sup>1</sup>, Eva Heinz<sup>3\*</sup>

## 4 Author affiliations

5  
6  
7 <sup>1</sup> Departments of Vector Biology and Tropical Disease Biology, Centre  
8 for Neglected Tropical Disease, Liverpool School of Tropical Medicine,  
9 Liverpool, UK

10  
11 <sup>2</sup> Department of Vector Biology, Liverpool School of Tropical Medicine,  
12 Liverpool, UK

13  
14 <sup>3</sup>Departments of Vector Biology and Clinical Sciences, Liverpool  
15 School of Tropical Medicine, Liverpool, UK

## 16 17 18 \*Correspondence

19 Eva Heinz; [eva.heinz@lstm.ac.uk](mailto:eva.heinz@lstm.ac.uk)

## 20 21 22 23 24 **1 Abstract**

25 The microbiome is a collection of microbes that exist in symbiosis with a host.

26 Whole genome sequencing produces off-target, non-specific reads, to the

27 host in question, which can be used for metagenomic inference of a

28 microbiome. This data is advantageous over barcoding methods since

29 higher taxonomic resolution and functional predictions of microbes are

30 possible. With the growing number of genomic sequencing data publicly

31 available, comes opportunity to elucidate reads pertaining to the microbiome.

32 However, characterization of these reads can be complex, with many steps

33 required to perform a robust analysis. To address this, we developed  
34 MINUUR (**M**icrobial **I**nsights **U**sing **U**nmapped **R**eads); a snakemake  
35 pipeline to characterize non-host reads from existing genomic data. We  
36 apply this pipeline to ten, publicly available, high coverage *Aedes aegypti*  
37 (*Ae. aegypti*) genomic samples. Using MINUUR, we describe species level  
38 microbial classifications; predict microbe associated genes and pathways  
39 and find bacterial metagenome assembled genomes (MAGs) associated to  
40 the *Ae. aegypti* microbiome. Of these MAGS, 19 are high-quality  
41 representatives with over 90% completeness and under 5% contamination.  
42 In summary, we present an in-depth analysis of non-host reads from *Ae.*  
43 *aegypti* whole genome sequencing data within a reproducible and open-  
44 access pipeline.

## 45 **2 Introduction**

46 A microbiome refers to the collection of microbes and their genomic content  
47 that exist in symbiosis with a host (1). To identify taxa within a microbiome,  
48 culture independent approaches are commonly used (2,3) such as amplicon-  
49 based sequencing with taxonomic barcodes (3) or metagenomic shotgun  
50 sequencing (4). The later approach is advantageous because higher  
51 taxonomic resolution and functional predictions are possible, either from the

52 sequenced reads directly or using contiguous assemblies. Sequencing the  
53 DNA of a whole organism to obtain its genomic information yields data from  
54 the primary organism of interest (referred throughout the manuscript as  
55 “host” for simplicity), but potentially also reads corresponding to  
56 endo/ectosymbionts, pathogens or environmental contamination that is not  
57 readily removed from the host during sample preparation. Indeed, studies in  
58 *Drosophila*, bumble bees, killer whales, moths and nematodes have shown  
59 existing whole genome sequencing (WGS) data is a rich source to  
60 characterize their associated symbionts (5–10). These studies employ  
61 approaches including specific enrichment of non-host with bait sequences  
62 targeting a specific taxon of interest (5,8); or steps following the sequencing  
63 experiment without prior enrichment, such as *de novo* metagenome  
64 assemblies (9–11); prediction of microbial genes and pathways (5) or  
65 classification-based methods using predefined taxonomic libraries (6).

66 Mosquitoes are important vectors for human pathogens. A prominent  
67 example of this is *Aedes aegypti* (*Ae. aegypti*) which transmits pathogens  
68 including dengue virus, yellow fever virus, chikungunya virus and Zika virus.  
69 Dengue cases alone are estimated to cause 10,000 deaths and 100 million  
70 infections per year, contributing to significant burden of human morbidity and  
71 mortality worldwide (12). Studies show the mosquito microbiome influences

72 vectorial capacity (13), blood feeding propensity (14) and life history traits  
73 (15–17). Mosquito microbiomes are understood to be highly variable,  
74 dependent on a suite of deterministic processes such as the environment  
75 (18–21), host factors (22,23), microbial interactions (14,24,25) and  
76 mosquito-microbe interactions (26,27). These important findings have been  
77 aided by amplicon based 16S rRNA sequencing approaches to characterize  
78 the microbiome. Complementary to this, we believe a metagenomic  
79 approach would add further insight of the mosquito microbiome by adding  
80 the genomic context of key symbionts. Whole genome shotgun sequencing  
81 is commonly used to study mosquito genomics (28,29), population genomics  
82 (30) and insecticide resistance (31); meaning non-mosquito sequence data  
83 (we refer to these as unmapped reads for the remainder of the manuscript)  
84 are a source to identify mosquito microbiome members using  
85 metagenomics. Genomic surveillance programs such as the *Anopheles*  
86 *gambiae* 1000 Genomes Project contain a large number of genomic samples  
87 with each release (32) and, at time of writing, currently 100,514 *Ae. aegypti*  
88 whole-genome sequencing runs are deposited on the European Nucleotide  
89 Archive. As such, there is great potential to leverage existing mosquito WGS  
90 data to explore mosquito-microbiomes from their unmapped sequences.

91 To make use of this large resource of already-available data we developed  
92 MINUUR, a user configurable Snakemake pipeline to provide **Microbial**  
93 **INsight Using Unmapped Reads** from WGS data. MINUUR uses short read,  
94 whole genome sequencing data as input and performs a robust analysis of  
95 unmapped reads associated to a host in question. We used MINNUR on an  
96 existing *Ae. aegypti* study (30) and describe the associated microbes based  
97 on taxonomic read classifications; predicted genes and metabolic pathways;  
98 and reconstruct quality checked metagenome assembled genomes (MAGs)  
99 pertaining to mosquito-associated bacteria using *de novo* metagenome  
100 assemblies. The application of MINUUR can provide additional insights of  
101 existing WGS data to investigate microbes associated with their host of  
102 interest.

### 103 **3 Materials and Methods**

#### 104 **3.1 Specifications**

105 The MINUUR pipeline (Figure 1) is implemented in Snakemake (33) and  
106 available from github at <https://github.com/aidanfoo96/MINUUR>. Details of  
107 the pipeline are discussed in the following section.

#### 108 **3.2 Database Setup**

109 MINUUR requires several databases. This includes a high quality bowtie2-  
110 indexed reference genome (34) to separate host and non-host reads; a  
111 KRAKEN2 (35), BRACKEN (36) and MetaPhlAn3 (37) database for  
112 taxonomic read classification; and ChocoPhlAn (38) and UniRef (39)  
113 databases for functional read profiling with HUMAnN3 (38). All databases  
114 are available in their respective GitHub repositories. The databases used in  
115 this study include the default MetaPhlAn3 marker gene database, default  
116 ChocoPhlAn and UniRef90 databases, and KRAKEN2 (35) and BRACKEN  
117 (36) indexes from the Ben Langmead repository located here:  
118 <https://benlangmead.github.io/aws-indexes/k2>. For our study, we  
119 downloaded and compiled these default databases.

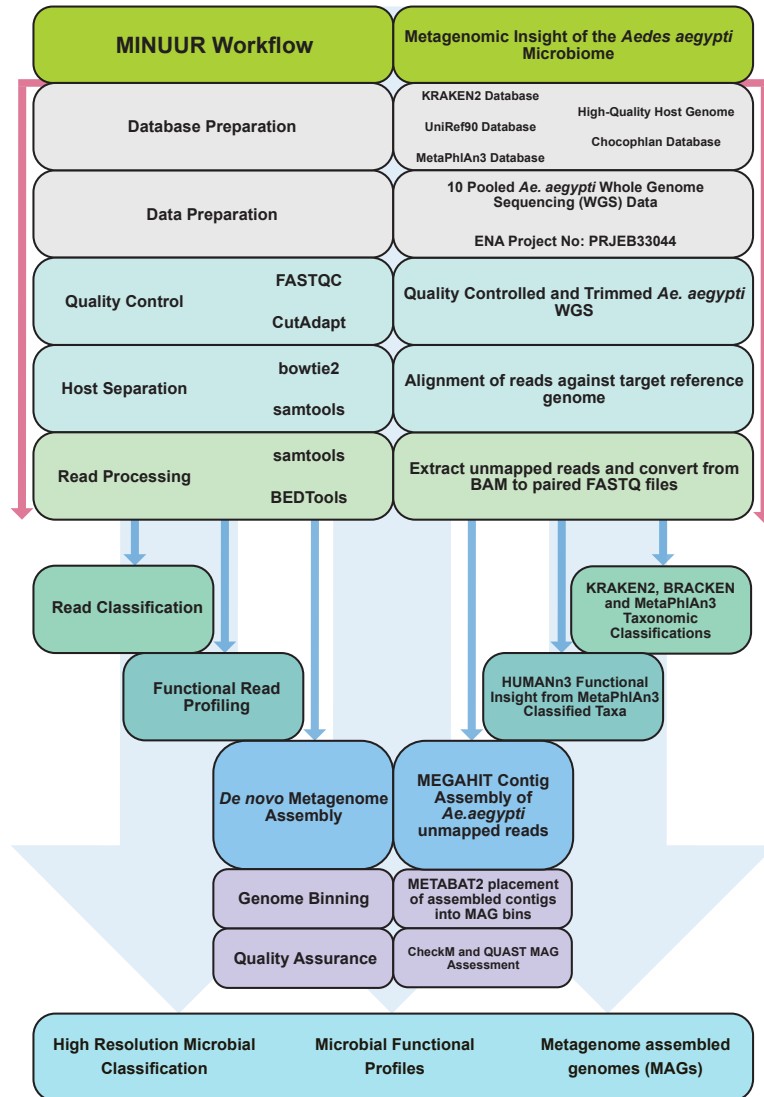

120

121 **Figure 1:** Microbial Insight Using Unmapped Reads (MINUUR). Workflow describing the  
 122 pipeline's main steps. Top to bottom describes the workflow of the pipeline. Left panels describe  
 123 MINUUR's key steps and tools, right panels describe our application of MINUUR on *Ae. aegypti*  
 124 samples used in this study. Initial steps highlighted by the red arrows indicate pre-processing steps,  
 125 including database preparation, quality control, read trimming, host-alignment and host-  
 126 separation. Blue arrows indicate the characterization of unmapped reads. The three main outputs  
 127 of MINUUR, indicated in the bottom panel, are microbial classifications, functional profiles and  
 128 assembly of metagenome assembled genomes.

129

130

131

### 132 **3.3 Data Preparation**

133 MINUUR accepts either BAM or paired FASTQ inputs. For FASTQ inputs,  
134 MINUUR performs quality control (QC) using FASTQC (v0.11.9) (40),  
135 providing a QC report per sample. MINUUR does not use the FASTQC report  
136 in subsequent steps, but only as a quality assurance metric for the user and  
137 to estimate if read trimming is required. Read trimming can be performed  
138 within MINUUR using Cutadapt (v1.5) (41) with user defined parameters for  
139 minimum read length, base quality and adapter content (default: minimum  
140 base length = 50, average base quality = 30). To separate host and non-host  
141 reads, reads are aligned using Bowtie2 (v2.4.4) (34) against a user defined  
142 indexed reference genome (the relevant host genome). Alignment sensitivity  
143 and type (global or local) can be adjusted within the pipeline at the user's  
144 discretion. A high quality, chromosome level assembled, reference genome  
145 is recommended if available. In situations where this is not possible, users  
146 should be aware that read alignment will likely result in mismatches between  
147 the reference and target sequence and produce alignments with poor  
148 coverage (42). As a result, unmapped reads used in subsequent steps are  
149 likely to contain a substantial number of host data. In this instance, we  
150 suggest users extract KRAKEN2 classified reads pertaining to known  
151 microbes to improve functional read profiling and metagenome assembly



152 (see later section). Unmapped reads within the coordinate sorted binary  
153 alignment (BAM) file are extracted using Samtools (v.1.14) (43) ("samtools -  
154 view -f 4") and converted to FASTQ format using bedtools (v2.3.0) (44) ("–  
155 bamToFastq"). Since a large number of existing data is available in BAM  
156 format, the user may also define a BAM input, from which the pipeline will  
157 begin at the BAM separation stage.

158 MINUUR performs best when the initial number of reads from the host is high  
159 and library preparation stages minimize loss of prokaryotic DNA. For our  
160 study, we used an example dataset (30) which described genetic variation in  
161 *Ae. aegypti* infected with *Wolbachia* from high and low dengue virus blocking  
162 populations (30). The published sequencing data was retrieved from the  
163 European Nucleotide Archive (ENA) under the project accession number  
164 PRJEB33044 (30). We retrieved ten FASTQ files representing 90 pooled  
165 mosquitoes, sequenced with an Illumina HiSeq 3000 with 150bp paired-end  
166 reads to high coverage (>400,000,000 reads per pair) in the original study  
167 (30).

### 168 **3.4 Read Classification**

169 MINUUR uses two read classification approaches to infer taxonomy.  
170 KRAKEN2 (v2.1.2) (35) uses a k-mer based approach to map read

171 fragments of k-length against a taxonomic genome library of k-mer  
172 sequences, whereas MetaPhlAn3 (v3.0.13) (37) aligns reads against a  
173 library of marker genes using Bowtie2 (34). Both strategies are employed to  
174 provide a wide classification range to the user, with the results subsequently  
175 used in downstream analysis steps. Specifically, MINUUR provides the  
176 option to use KRAKEN2 classified reads, parsed from KrakenTools (v1.2),  
177 to select a specific set of reads (for example bacterial) for metagenome  
178 assembly. MetaPhlAn3 taxonomic classifications are used in conjunction  
179 with the ChocoPhlAn database to identify microbe associated genes and  
180 pathways. The output of MetaPhlAn3 is the relative abundance of microbes  
181 within a sample, whereas KRAKEN2 reports the number of reads associated  
182 to a specific taxonomic ID. To estimate the relative taxonomic abundance  
183 from KRAKEN2 classifications, MINUUR will parse KRAKEN2 read  
184 classifications to BRACKEN (v2.6.2) (36) which uses a Bayesian probability  
185 approach to redistribute reads assigned at higher taxonomic levels to lower  
186 (species) taxonomic levels.

187 MINUUR outputs classified and unclassified reads to paired FASTQ files and  
188 generates BRACKEN estimated taxonomic abundance profiles for further  
189 analysis. Furthermore, the user can specify KrakenTools to extract a specific  
190 taxon or group of taxa from KRAKEN2 - these can be used in later stages of

191 the pipeline to reduce non-specific reads for metagenome assemblies or  
192 further statistical analysis at the user's discretion.

### 193 **3.5 Functional Read Profiling**

194 Functional profiling aims to infer microbial function directly from read  
195 sequences without metagenome assembly. MINUUR implements  
196 HUMAnN3 (v3.0.0) (the HMP Unified Metabolic Analysis Network) (38) to  
197 functionally classify read sequences. Taxonomic classifications from  
198 MetaPhlAn3 (37) are identified using the ChocoPhlAn pan-genome database  
199 (37) annotated with UniRef90 (39) cluster annotations. In addition, non-  
200 classified reads are searched against UniRef90 clusters to identify  
201 unclassified taxonomic genes. HUMAnN3 produces taxonomic  
202 classifications using MetaPhlAn3 and associated gene family abundance in  
203 RPK (reads per kilobase) with UniRef90 annotations and metabolic pathway  
204 abundances (RPK) and coverage.

### 205 **3.6 Metagenome Assembly, Binning and Quality Assurance (QA)**

206 MINUUR will perform *de novo* metagenome assembly to produce contiguous  
207 sequences (contigs) from either all unmapped reads or KRAKEN2 classified  
208 reads. MEGAHIT (v1.2.9) (45), a rapid and memory efficient metagenome

209 assembler, is used for *de novo* metagenome assembly. Assembled contigs  
210 are quality checked using QUAST (v5.0.2) (46) to assess contig N50 and  
211 L50 scores. The resultant contigs, which are ultimately fasta files with  
212 sequences pertaining to genomic regions of a microbe, need to be placed  
213 within defined taxonomic groups - referred to as a bin. For this, contigs are  
214 indexed using the Burrows Wheeler Aligner (BWA) (v0.7.17) (47), and the  
215 original unmapped or KRAKEN2 classified reads are aligned to the indexed  
216 contigs using “-bwa-mem”. The subsequent coordinate sorted BAM file is  
217 parsed to the “jgi\_summarize\_bam\_contig\_depth” script from MetaBAT2  
218 (v2.12.1) (48) to produce a depth file of contig coverage. The depth file and  
219 assembled contigs are input to the metagenome binner MetaBAT2 (v2.12.1)  
220 (48), to group contigs in defined genomic bins. Each bin is a predicted  
221 metagenome assembled genome (MAG). CheckM (v1.1.3) (49) is used for  
222 quality assurance of each bin by identifying single copy core genes.  
223 Specifically, bin contamination is assessed by looking for one single copy  
224 core gene within each bin, and completeness by calculating a required set  
225 of single copy core genes.

226

227

## 228 **3.7 Pipeline Configuration**

229 Ten paired Illumina HiSeq 3000 raw FASTQ reads were used as input in the  
230 'data' directory of MINUUR, with names of each sample listed in the  
231 'samples.tsv' file within the configuration directory. To implement the  
232 pipeline, the configuration file was set to the following parameters: FASTQ =  
233 True, QC = True, CutadaptParams = "--minimum-length 50 -q 30",  
234 RemoveHostFromFastqGz = True, AlignmentSensitivity = "--sensitive-local",  
235 ProcessBam = True, From-Fastq = True, KrakenClassification = True,  
236 ConfidenceScore = 0, KrakenSummaries = True, GenusReadThreshold =  
237 1000, SpeciesReadThreshold = 30000, ExtractKrakenTaxa = True, taxon  
238 choice = "2" (bacteria), BrackenReestimation = True, ClassificationLvl = 'S'  
239 (species) and 'G' (genus), DistributionThresh = 10, MetaphlanClassification  
240 = True, HumannAnalysis = True, GetBiologicalProcess = True, Process =  
241 'siderophore', MetagenomeAssm = True, MetagenomeBinning = True  
242 (UseKrakenExtracted was set to True and False in separate pipeline runs),  
243 MinimumContigLength = 1500, CheckmBinQA = True. All databases were  
244 installed from their respective repositories from Github into the 'resources'  
245 directory of MINUUR. The pipeline was run on an Ubuntu Linux system with  
246 660gb of available memory and 128 CPUs. For our analysis, with the above  
247 settings and 10 cores available, MINUUR took 72 hours to complete; the

248 maximum Resident Set Size (RSS) of an individual sample during this run  
249 was 9771 RSS (occurring during metagenome assembly); and total storage  
250 used (including temporary files) was 4.1Tb (terabytes) across all 10 samples  
251 used in this study.

252

### 253 **3.8 Taxonomic Classification of MAGs with GTDB-Tk**

254 Separate from MINUUR, all bins produced from MetaBAT2 were  
255 taxonomically classified with GTDB-Tk (50) (v1.5.0) using “-classify-wf”  
256 against the Genome Taxonomy Database (GTDB) (release 06-RS202,  
257 27/04/21). GTDB-Tk assigns genes to MAGs using Prodigal (v2.6.3) (51);  
258 ranks the taxonomic domain of each MAG using 120 bacteria and 122  
259 archaea marker genes with HMMER (52) using a published database (53).  
260 With this information, MAGs are placed into domain specific reference trees  
261 with pplacer (v1.1) (54). Taxonomic classification with GTDB-Tk is based on  
262 placement within the GTDB reference tree, relative evolutionary divergence  
263 and average nucleotide identity (ANI) scores. The relative evolutionary  
264 divergence score is used to refine ambiguous taxonomic rank assignments  
265 and ANI scores used to define species classifications. Using this approach,

266 strain variants are defined when average nucleotide identity is greater than  
267 95% - below this threshold a MAG is classified as a novel species.

## 268 **4 Results**

### 269 **4.1 MINUUR Application**

270 MINUUR is a Snakemake pipeline that separates and characterizes non-  
271 host, unmapped reads from WGS data using a series of metagenomic tools.  
272 The pipeline is broadly split into three paths; i) read classification with k-mers  
273 (KRAKEN2) or marker genes (MetaPhlan3); ii) functional read profiling with  
274 HUMAnN3 and iii) *de novo* metagenome assembly with MEGAHIT followed  
275 by binning (MetaBAT2) and MAG quality assurance (QUAST and CheckM)  
276 (Figure 1). Taxonomic classifications and functional profiles are produced as  
277 'tidy data' formats to easily parse for further analysis. MINUUR is open  
278 source and available on Github: <https://github.com/aidanfoo96/MINUUR>,  
279 with an accompanying WIKI page available here:  
280 <https://github.com/aidanfoo96/MINUUR/wiki>.

### 281 **4.2 MINUUR Extracts Unmapped Reads from Host-aligned WGS Data**

282 The initial number of reads were counted per sample. The mean number of  
283 paired reads per sample was 548,373,996, ranging between 466,236,232 to

284 603,970,014 reads (Figure 2A). After alignment to the *Ae. aegypti* reference  
285 genome (AegL5.3 GCA\_002204515.1) with bowtie2, the proportion of  
286 mapped and unmapped reads was calculated. On average, 497,688,151  
287 reads (range: 418,353,293 to 563,050,257) aligned to the AegL5.3  
288 reference genome, averaging 90.8% read alignment (Figure 2A). To  
289 estimate the number of reads associated to the microbiome, we calculated  
290 the overall number of KRAKEN2 classifications from all unmapped reads  
291 (Figure 2B). On average, MINUUR classified 81.3% of reads that did not map  
292 to the *Ae. aegypti* genome (Figure 2B). The mean number of classified reads  
293 using KRAKEN2 was 19,910,928, ranging between 4,887,498 to 48,298,960  
294 reads, and the number of unclassified reads was 3,331,246 on average,  
295 ranging between 2,702,596 and 4,614,580 reads (Figure 2C).

296

297

298

299

300

301

302

303

304



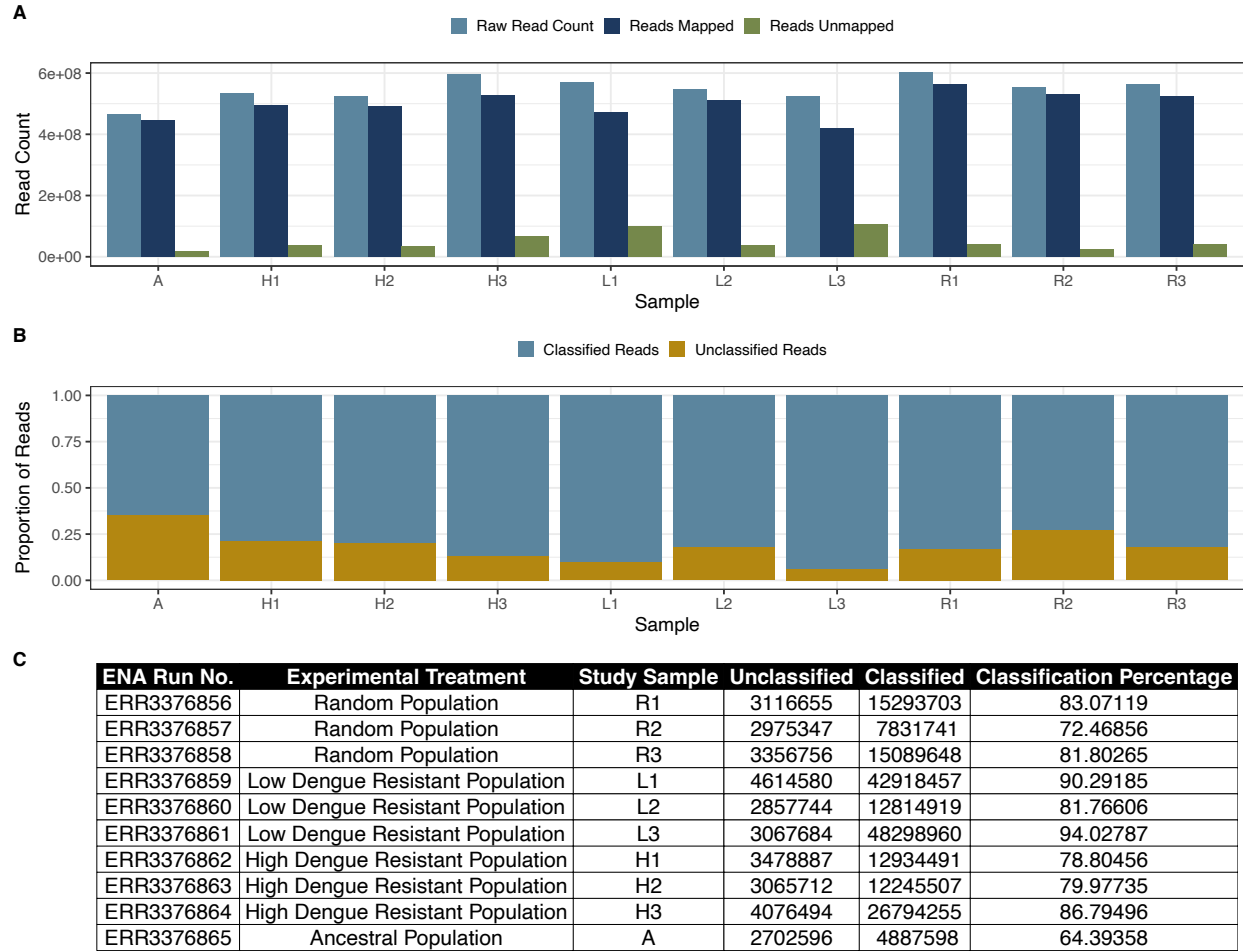

305

306 **Figure 2:** Read Alignment and Classification Statistics. **A** Grouped bar graphs depicting total reads  
 307 (light blue), aligned reads (dark blue) and unaligned reads (green) from 10 pooled *Ae. aegypti*  
 308 samples after alignment to the *AaegL5.3* reference genome using Bowtie2 (v2.4.4) (33) within  
 309 MINUUR. **B** Stacked bar graphs showing KRAKEN2 classified read proportions from unmapped  
 310 read sequences. Classified reads = light blue, unclassified reads = gold. **C** Table showing (left to  
 311 right) the original sequencing run, experimental treatment, sample number, unclassified read  
 312 count, classified read count and percentage of classified reads.

313

314

315

316

### 317 **4.3 MINUUR produces Genus and Species Classifications from** 318 **Unmapped Reads**

319 41 different genera were classified with KRAKEN2 and relative abundance  
320 estimated with BRACKEN (Figure 3). Genera present across all samples  
321 include *Wolbachia*, *Staphylococcus*, *Salmonella*, *Pseudomonas*,  
322 *Phytobacter*, *Klebsiella*, *Escherichia*, *Enterobacter*, *Elizabethkingia*,  
323 *Clostridium*, *Citrobacter*, *Chryseobacterium*, *Bacillus* and *Acinetobacter*  
324 (Figure 3A). Several genera, summed across all samples in this study,  
325 contained high read numbers including *Wolbachia* (73,746,796 reads),  
326 *Elizabethkingia* (92,471,561), *Pseudomonas* (24,455,843), *Acinetobacter*  
327 (1,524,766), *Stenotrophomonas* (1,823,242), *Delftia* (346,944),  
328 *Chryseobacterium* (665,791) and *Klebsiella* (345,966 reads) (Figure 3C).

329 Each sample represents a pool of *Ae. aegypti* mosquitoes with different  
330 dengue blocking phenotypes (high = H, low = L, random = R) as described  
331 in the original publication (30). We were interested to see if certain bacteria  
332 were uniquely present in a given experimental group. Within the high dengue  
333 blocking populations (H1, H2, H3), *Bacteroides*, *Lactobacillus*, *Lactococcus*  
334 and *Pedobacter* were uniquely present (Figure 3D). Conversely,  
335 *Achromobacter*, *Acidovorax*, *Aeromonas*, *Bradyrhizobium*, *Comamonas*,

336 *Cronobacter*, *Delftia*, *Kosakonia*, *Paraburkholderia*, *Rhizobium* and *Vibrio*  
337 were only present in low dengue blocking (L1, L2, L3) populations (Figure  
338 3D).

339 Of reads that were classified with KRAKEN2, 81 different species were  
340 classified above a 30,000 read threshold (Figure 4A). Species present in all  
341 samples include *Wolbachia pipientis*, *W.* endosymbionts of *Aedes aegypti*,  
342 *Drosophila simulans*, *D. melanogaster*, *D. ananassae*, *D. ceratosolen* and  
343 *Elizabethkingia anophelis* (Figure 4A). *Pseudomonas* was a highly abundant  
344 genus classification (Figure 4A). Here, 43 different *Pseudomonas* species  
345 were identified, with *P. protegens*, *P. frederiksbergensis* and *P. koreensis*  
346 the most abundant *Pseudomonas* species identified across samples (Figure  
347 4A). We identify species with high read associations totaled across samples,  
348 notably *E. anophelis* (58,372,887 reads), *P. protegens* (4,742,920 reads), *P.*  
349 *flourescens* (5,384,368 reads), *P. koreensis* (1,968,181 reads), *W. pipientis*  
350 (1,774,201 reads), *Acinetobacter seifertii* (1,062,679 reads) and  
351 *Stentrophomonas maltophilia* (1,459,193 reads) (Figure 4C).

352 For this analysis, we set a read cutoff-threshold of 30,000 reads (filtering for  
353 high abundant classifications). However, species of low abundance are  
354 important to consider when interrogating a microbiome. MINUUR produces

355 trellis plots (facets) of each genus with the distribution of species relative  
356 abundance (Supplementary Fig 1), estimated with BRACKEN. To exemplify,  
357 we describe the classification of the commonly identified symbiont *Serratia*  
358 in *Ae. aegypti* (50; 26; 56). We find *Serratia* contains 14 classified species,  
359 with *S. marcescens* present at the highest abundance compared to other  
360 species and across all samples (Supplementary Fig 1). Other notable  
361 classifications include *S. fonticola* and *S. symbiotica*.

362 High sequence similarity among microbes of the same genus and species is  
363 common. With KRAKEN2, reads with a classification that overlap with two or  
364 more taxa will be assigned to the highest taxonomic level where a delineation  
365 is detected. To this end, genus or species level taxonomic classifications,  
366 interpreted as relative abundance, could lead to underestimation since reads  
367 may be assigned at higher taxonomic levels. MINUUR implements  
368 BRACKEN to infer relative abundance from KRAKEN2 classified reads at  
369 lower taxonomic levels (genus or species). Of the original KRAKEN2  
370 classified reads (197,240,903), 1,821,131 reads were redistributed to genus  
371 level (Figure 3B). On average, 182,113 reads were added per sample (range  
372 = 80,503 to 188,441 reads). Genera with the most added reads include  
373 *Elizabethkingia* (368,564 reads), *Salmonella* (340,228 reads), *Escherichia*  
374 (217,985 reads), *Enterobacter* (184,844) and *Pseudomonas* (159,493)

375 (Figure 3B). From the original KRAKEN2 classified reads at species level,  
376 109,895,493 reads were redistributed with BRACKEN. On average,  
377 10,989,659 reads were added per sample (range = 3,316,449 to 21,706,942  
378 reads) (Figure 4B). Species with the most added reads include the  
379 *Wolbachia* endosymbiont of *Ae. aegypti* (59,708,135 reads), *E. anophelis*  
380 (32,166,299 reads), *P. fluorescens* (1,364,494 reads) and *Pseudomonas sp.*  
381 *S150* (1,017,521 reads) (Figure 4B).

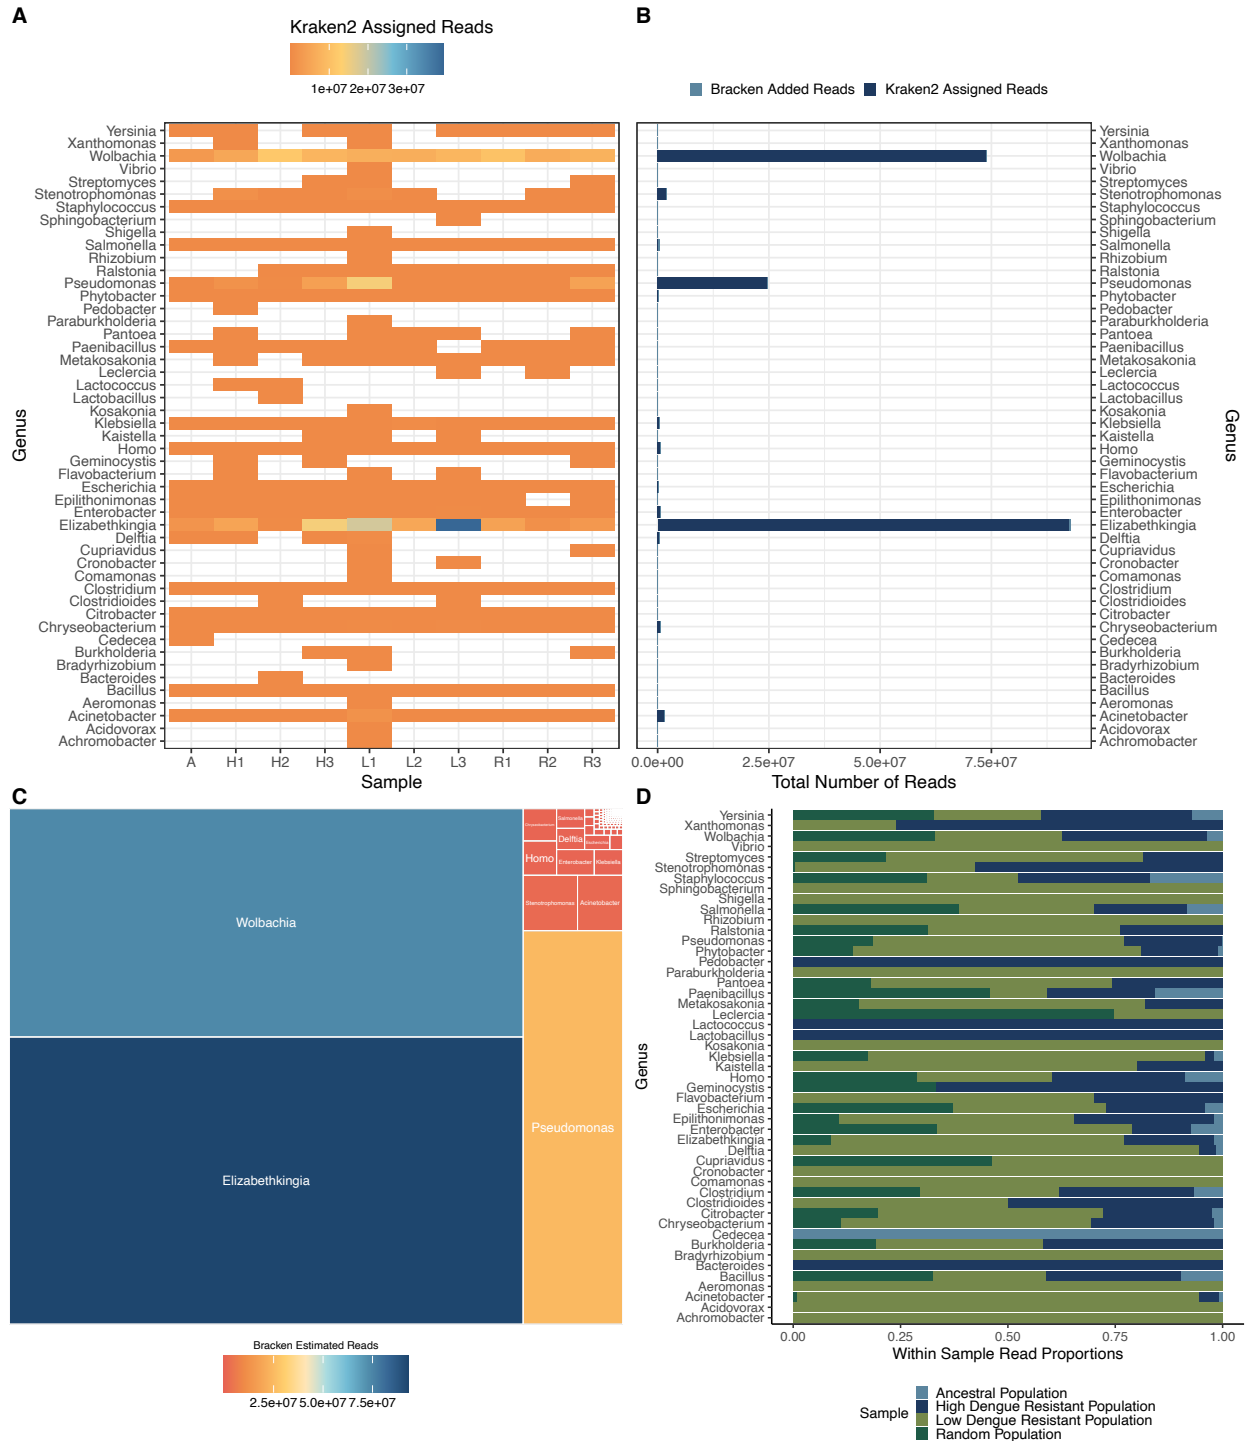

382

383 **Figure 3: KRAKEN2 (v1.2) Genus Classifications and BRACKEN (v2.6.2) Abundance**  
 384 **Estimation. A.** Heatmap depicting genus level classifications and read abundance per sample.  
 385 Genera shown are those with >1,000 assigned reads. Orange = low relative taxonomic abundance.  
 386 Blue = high relative taxonomic abundance. **B.** Bar chart depicting total number of reads associated  
 387 to each genus. Light blue = BRACKEN added reads, dark blue = KRAKEN2 classified reads. **C.**

388 Spatial chart depicting BRACKEN estimated read abundance within KRAKEN2 classified genera.  
389 Each block size is proportional to the total reads classified to each genus. **D.** Proportional  
390 taxonomic assignments within each experimental group. Each colour denotes the experimental  
391 group each taxon originated from.

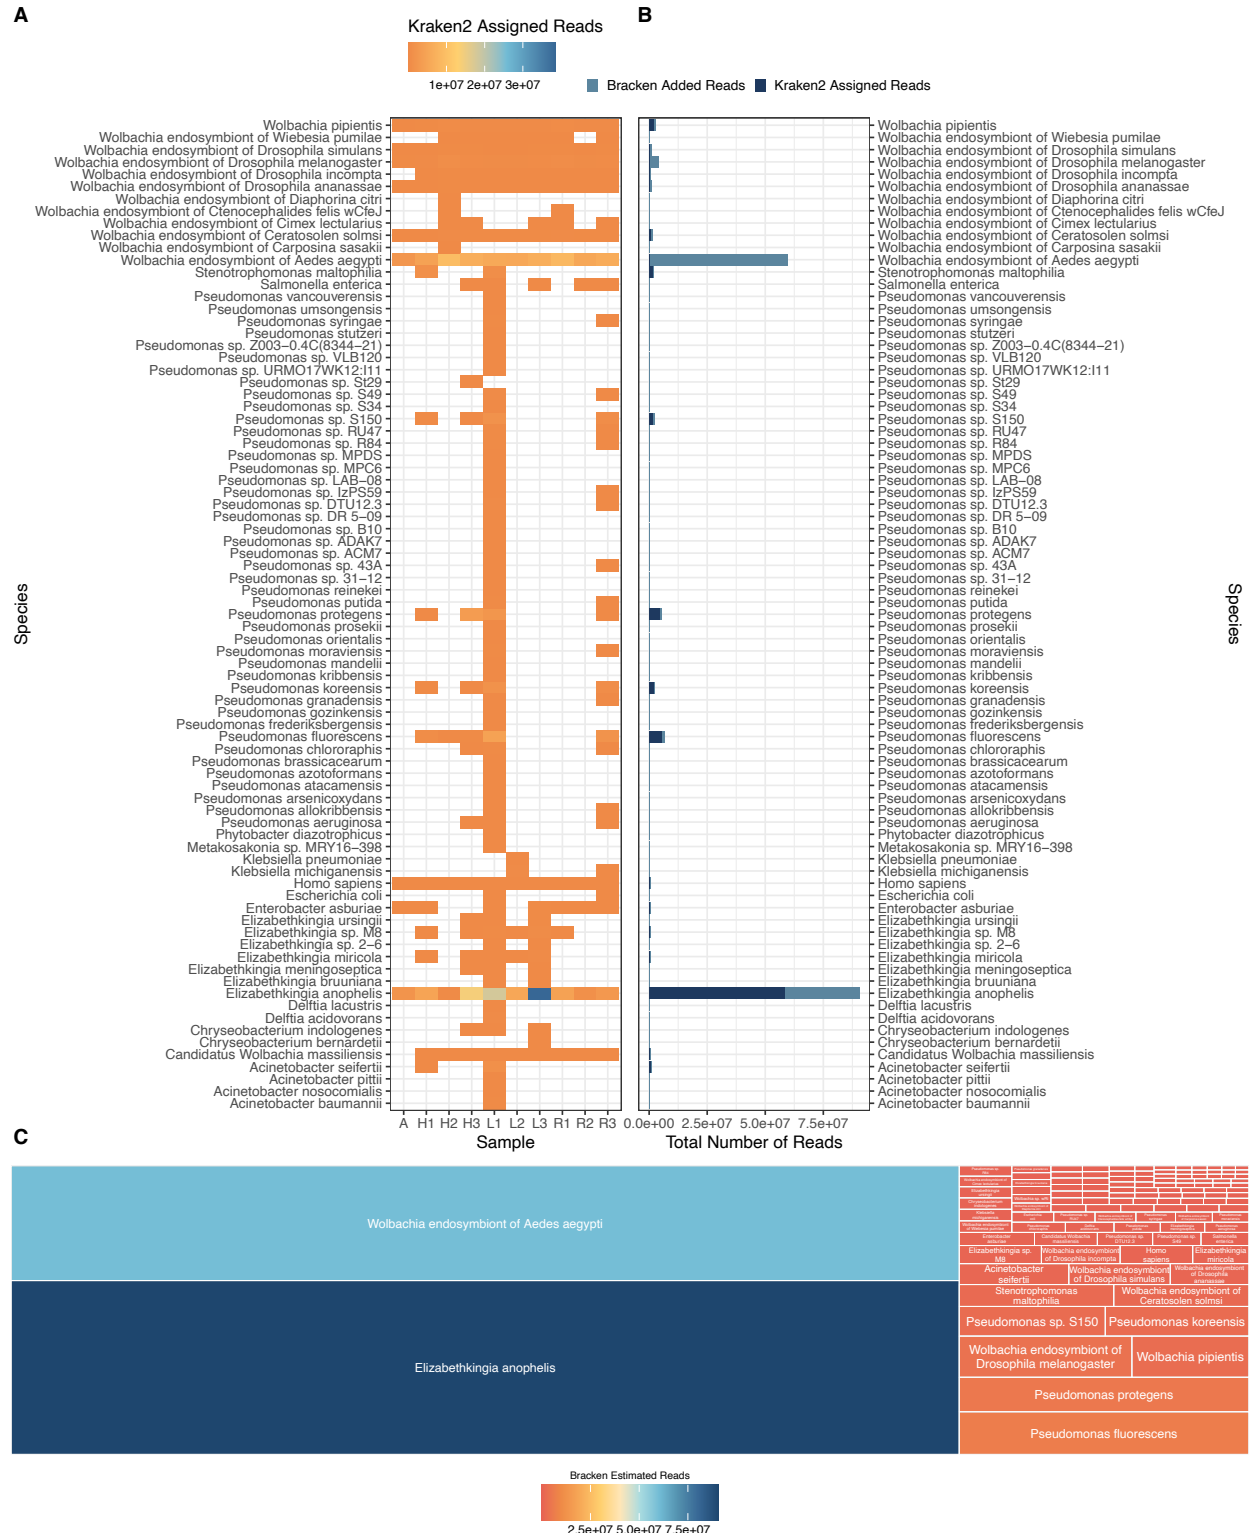

392

393 **Figure 4:** KRAKEN2 (v1.2) species classification and BRACKEN (v2.6.2) abundance estimation.  
 394 **A.** Heatmap depicting species level classifications and total assigned read number . Species shown  
 395 are those with >30,000 assigned reads. Orange = low taxonomic abundance. Blue = high



396 taxonomic abundance. **B.** Bar chart depicting total number of reads associated to each species.  
397 Light blue = BRACKEN added reads, dark blue = KRAKEN2 classified reads **C.** Spatial chart  
398 depicting BRACKEN estimated read number within KRAKEN2 classified species. Each block  
399 size is proportional to the total reads classified to each species.

400

#### 401 **4.4 MINUUR Predicts Microbial Function of Mosquito Associated**

#### 402 **Bacteria Using Unmapped Read Sequences**

403 MINUUR uses HUMAAaN3 to infer taxonomic functional profiles from read  
404 sequences directly. HUMAAaN3 intakes classified taxa (which have been  
405 classified using MetaPhlAn3 against a library of clade-specific marker genes)  
406 and identifies gene profiles and metabolic pathways using UniRef90  
407 annotations. In total, 107,196 genes with an ANI score of 90.5% (range =  
408 72.5% to 100%) were identified across ten taxa classified with MetaPhlAn3  
409 (Supplementary Figure 2A). On average, 10,720 genes (range = 4069 to 32,  
410 359) and 214 pathways (range = 84 to 719) were identified per sample  
411 (Supplementary Figure 2B). The ten identified taxa with associated genes  
412 and metabolic pathways consisted of *E. anophelis* (40,243 genes, 850  
413 metabolic profiles), *Stenotrophomonas maltophilia* (11,099 genes, 182  
414 metabolic profiles), *Chryseobacterium sp ISE14* (10,948 genes, 840  
415 metabolic profiles), *P. moraviensis* (10,045 genes, 246 metabolic profiles),  
416 *Klebsiella oxytoca* (8105 genes, 149 metabolic profiles), *K. michiganensis*

417 (7706 genes, 175 metabolic profiles), *Kluyvera intestini* (6133 genes, 206  
418 metabolic pathways), *Acinetobacter seifertii* (6112 genes, 129 metabolic  
419 profiles), *Delftia acidovorans* (5803 genes, 83 metabolic profiles) and  
420 *Wolbachia* endosymbiont of *Brugia malayi* (1002 genes, 27 metabolic  
421 pathways) (Supplementary Figure 2B).

422 Users can search specific genes and metabolic profiles of interest from  
423 HUMAaN3's output within MINUUR. For gene profiles, we show an example  
424 using the search term "siderophore" which are of interest given their previous  
425 functional characterization in *Anopheles gambiae* associated bacteria (55).  
426 Here, 17 siderophore related genes associated to nine MetaPhlAn3  
427 classified taxa were identified (Figure 5B). The TonB dependent siderophore  
428 receptor is present in seven bacteria. While both *K. michiganensis* and *K.*  
429 *oxytoca* contain the catecholate siderophore receptor *fiu* and the OMR family  
430 siderophore receptor (Figure 5B), suggesting an alternative mechanism for  
431 siderophore acquisition. Furthermore, we chose to examine metabolic  
432 pathways relating to 'heme'. We identify four pathways present in 5/8  
433 associated taxa, with these identified bacteria containing the pathways for  
434 heme b biosynthesis II. However, all identified pathways are incomplete with  
435 respect to the genes used to reconstruct the pathway (Figure 5A).

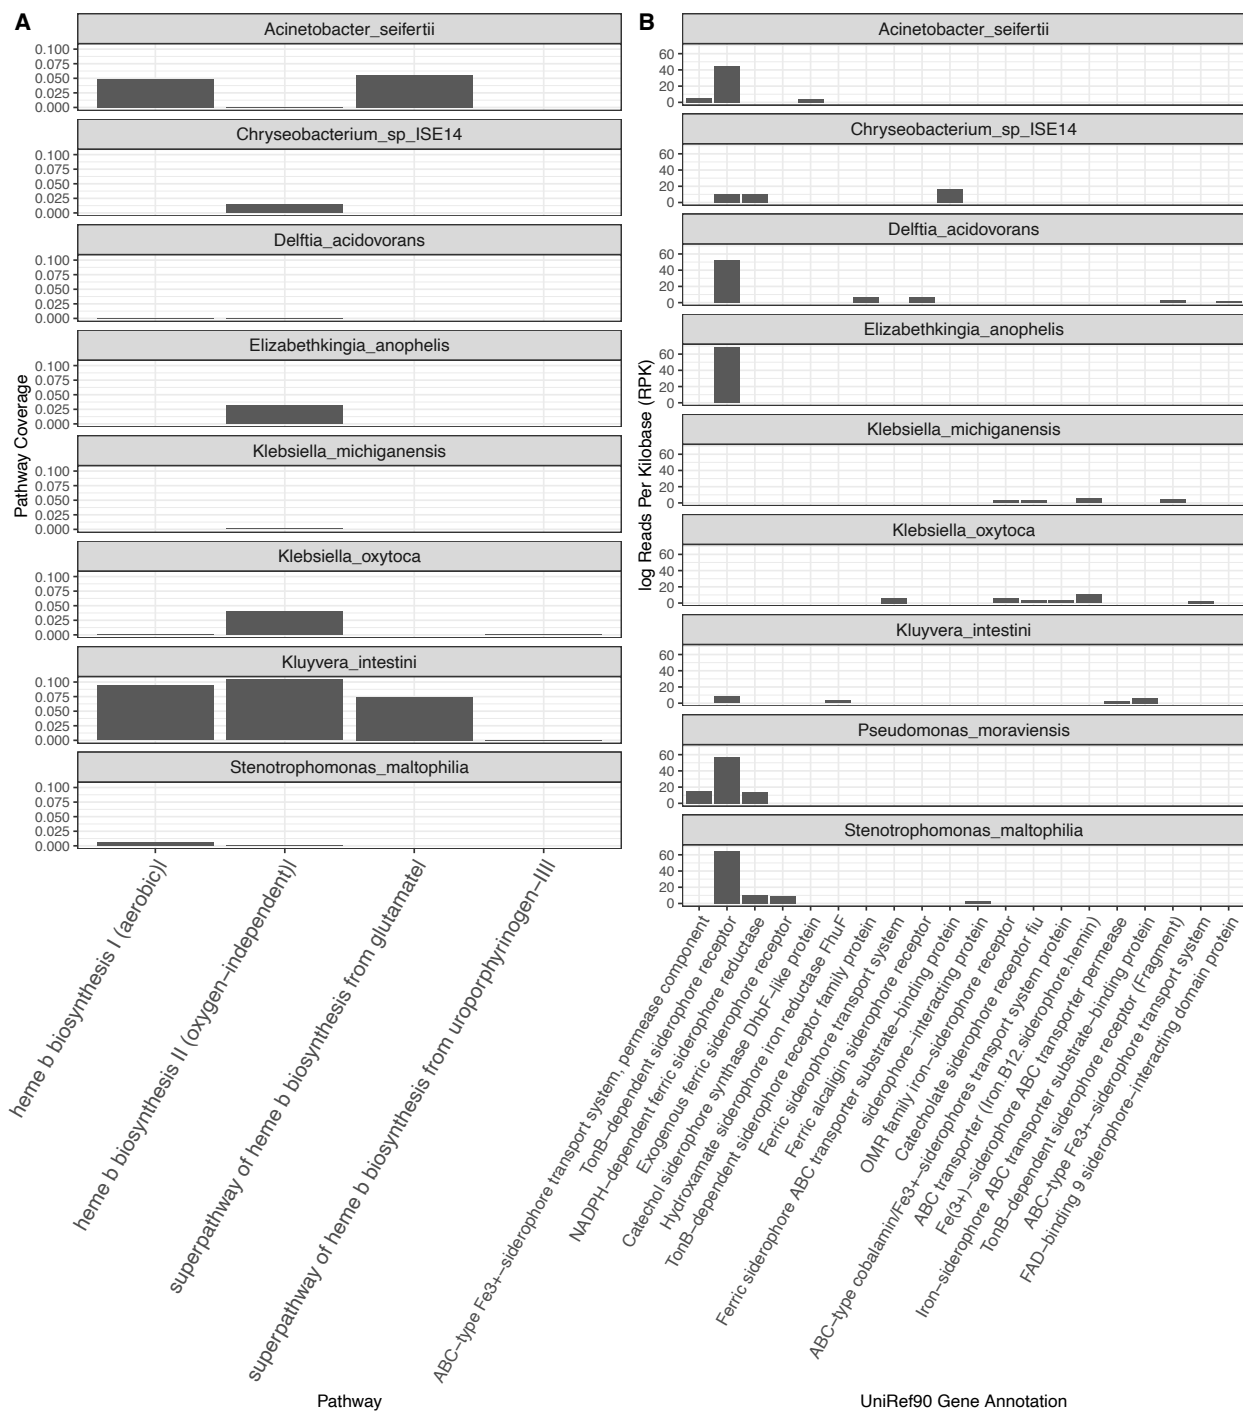

436

437 **Figure 5:** HUMAA3 (v3.0.0) functional profile of MetaPhlan3 (v3.0.13) classified taxa. **A.**  
 438 Faceted plot showing 'heme' related pathway coverages stratified across species. X-Axis shows  
 439 pathway coverage, denoted by the number of genes present that have reconstructed the pathway  
 440 (0 = no coverage, 1 = complete pathway coverage), Y axis shows pathway. **B.** Faceted plot of log  
 441 reads per kilobase (RPK) on the X axis, identified relating to 'Siderophores' on the Y axis. Gene  
 442 number is stratified across MetaPhlan3 classified bacterial species.

#### 443 **4.5 Bacterial Metagenome-assembled Genomes from *Ae. aegypti***

444 *De novo* metagenome assembly aims to reconstruct contiguous sequences  
445 or MAGs for further analysis. Here, we used two different approaches for  
446 metagenome assembly; i) using KRAKEN2 classified reads and ii) using all  
447 unmapped *Ae. aegypti* reads (composed of both taxonomically classified and  
448 unclassified reads). We used CheckM to assess MAG completeness and  
449 contamination based on the presence and copy number of single copy core  
450 genes. Assembly with KRAKEN2 classified reads produced MAGs with less  
451 contamination (Figure 6A, Figure 6C), while assembly with all unmapped  
452 reads produced a higher number of MAGs, but with higher contamination  
453 and lower completeness (<90% completeness) (Figure 6B, Figure 6D).

454 In total, we report the assembly of 43 *Ae. aegypti* associated MAGs using  
455 KRAKEN2 classified reads and 57 *Ae. aegypti* associated bacterial MAGs  
456 from all unmapped (classified and non-classified) reads (Figure 6A, Figure  
457 6B). Community accepted standards of MAG quality are defined by the  
458 genome standards consortium (GSC) (56). The GSC define high-quality draft  
459 MAGs as >90% complete and <5% contamination - from our study, 19 MAGs  
460 assembled using KRAKEN2 classified reads and 18 MAGs from all  
461 unmapped reads met the GSC defined high-quality threshold (Figure 6A,

462 Figure 6B) (56). Medium quality draft MAGs are defined by the GSC as >50%  
463 complete and <10% contamination; in which 30 MAGs from classified reads  
464 and 31 MAGs from all unmapped reads were identified in our study. Finally,  
465 low quality draft MAGs are defined by the GSC as <50% complete and <10%  
466 contamination, in which 12 MAGs from classified reads and 26 MAGs from  
467 all unmapped reads were identified.

468 Of MAGs with completeness >90%, the average genome size obtained from  
469 KRAKEN2 classified reads was 2.94Mb (megabases), ranging between  
470 1.06Mb and 5.70Mb (Figure 6F). The average genome size of MAGs  
471 obtained from all unmapped reads was 3.03Mb, ranging between 1.13Mb  
472 and 6.14Mb (Figure 6H). The mean N50 (the minimum contig length of an  
473 assembled contig that covers 50% of the genome) of MAGs from KRAKEN2  
474 classified reads was 97.5Kb (kilobases), ranging between 15.8Kb to 338Kb  
475 (Figure 6G). The mean N50 of MAGs from all unmapped reads was 126Kb,  
476 ranging between 5.78Kb to 591Kb (Figure 6I).

477 Outside of MINUUR, we used the taxonomic classifier GTDB-Tk to classify  
478 MAGs against the Genome Taxonomy Database (GTDB). 41 MAGs were  
479 classified with a mean FastANI score of 98.5%, ranging between 95.6% to  
480 100% (Figure 7C). No MAGs were identified with FastANI scores <95%,

481 meaning no novel *Ae. aegypti* associated bacterial species were found,  
482 however, MAGs with FastANI scores <99% are strain or subspecies variants.  
483 Species classified from all assembled MAGs include *E. anophelis*,  
484 *Wolbachia pipientis*, *Pseudomonas. E koreensis B*, *P. E protegens*,  
485 *Stenotrophomonas sp002192255*, *Acinetobacter seifertii*, *Comamonas*  
486 *acidovorans*, *Enterobacter cloacae M* and *Klebsiella. A michiganensis*  
487 (Figure 7C). We also compared genome sizes of each MAG to its closest  
488 reference genome (Figure 7A). 16 MAGs were smaller to their reference  
489 genome by mean = 284kb, and two MAGs were larger by mean = 82.8kb  
490 (Figure 7A). Congruent with the pairwise size differences between MAG and  
491 reference genome, we found the overall distribution of MAG vs reference  
492 genome size to be similar (Figure 7B). Two genomes skew this distribution  
493 (references pertaining to MAGs ERR3376859.4 and ERR3376862.4), which  
494 is consistent with the pairwise comparisons (Figure 7A).

495

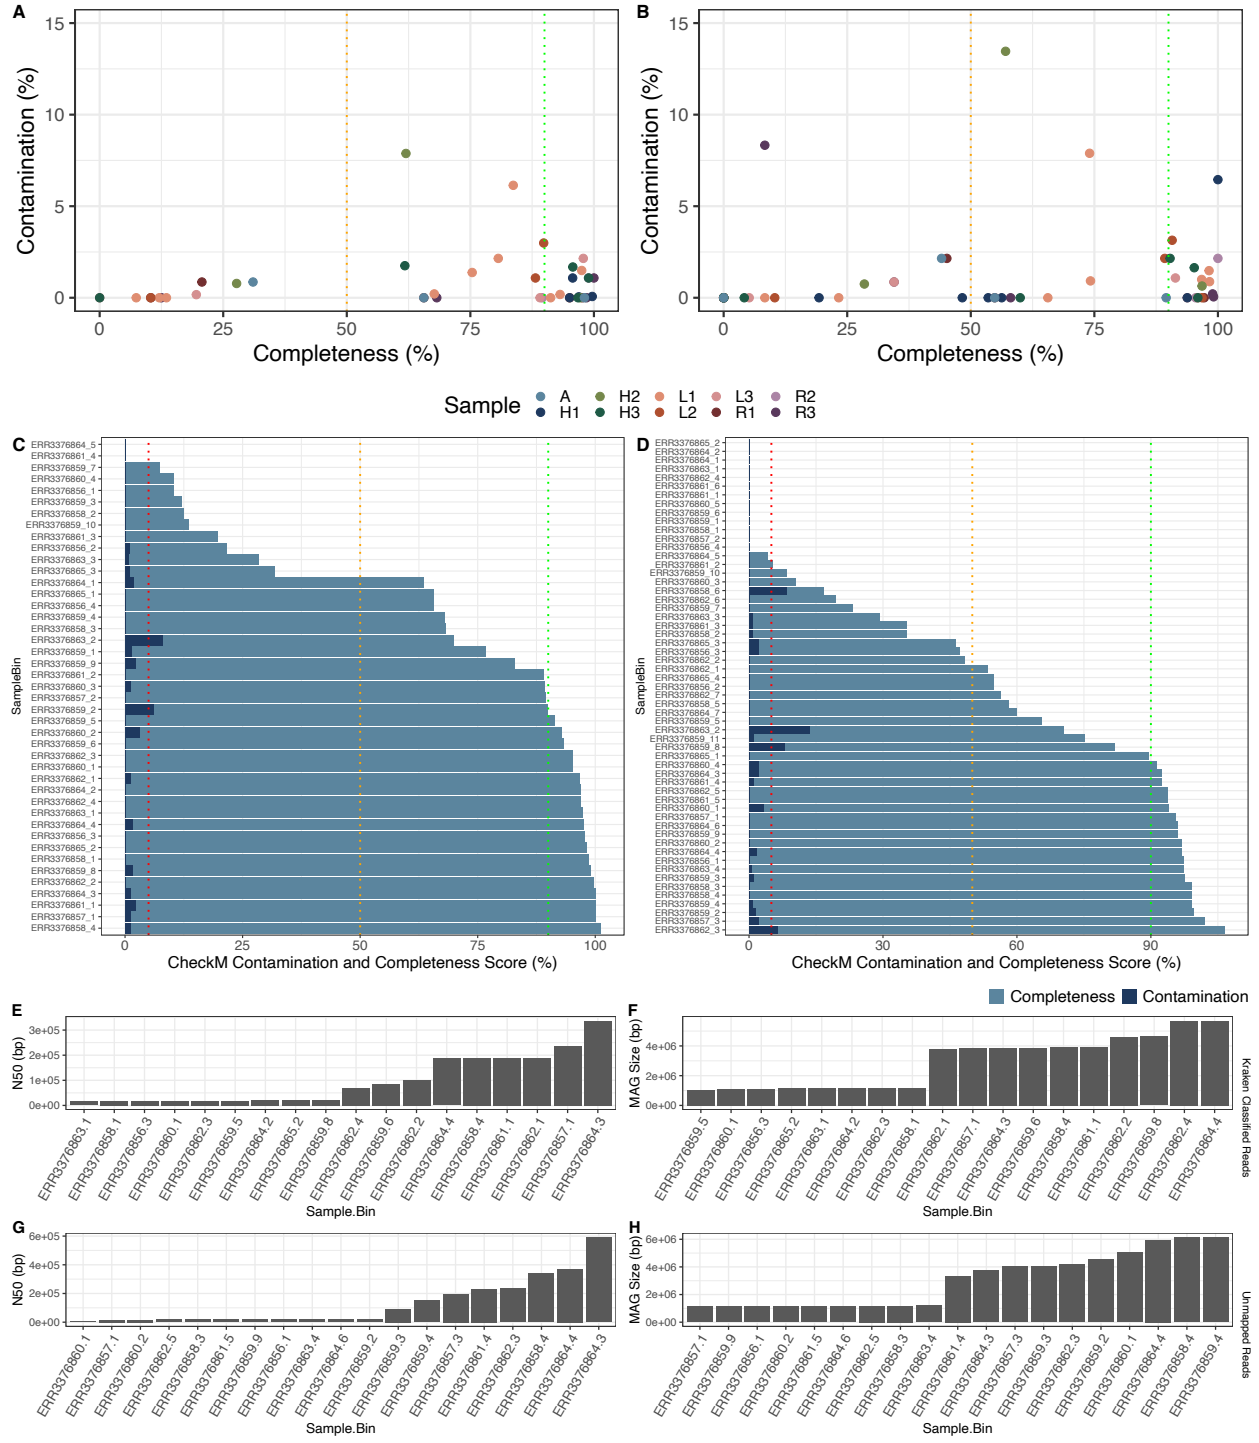

496

497 **Figure 6:** *Ae. aegypti* associated bacterial MAG statistics. (A). MAGs assembled from KRAKEN2  
 498 classified reads or (B). unmapped reads using MEGAHIT (v1.2.9) and binned with MetaBAT2  
 499 (v2.12.1). Colours denote each sample shown in the legend. 50% and 90% MAG completeness is  
 500 specified by the orange and green dotted line. x-axis = CheckM completeness, y-axis = CheckM  
 501 contamination. (C, D) Bar graph depicting completeness and contamination scores of each MAG,

502 light blue = completeness, dark blue = contamination, left = MAGs assembled using KRAKEN2  
 503 associated reads, right = MAGs assembled using unmapped reads. Red dotted line indicates 5%  
 504 contamination threshold (E, F) N50 and MAG size (base pairs) of MAGs assembled using  
 505 KRAKEN2 classified reads, with completeness over 90%. (G, H) N50 and MAG size (base pairs)  
 506 of MAGs assembled using unmapped reads, with completeness over 90%.

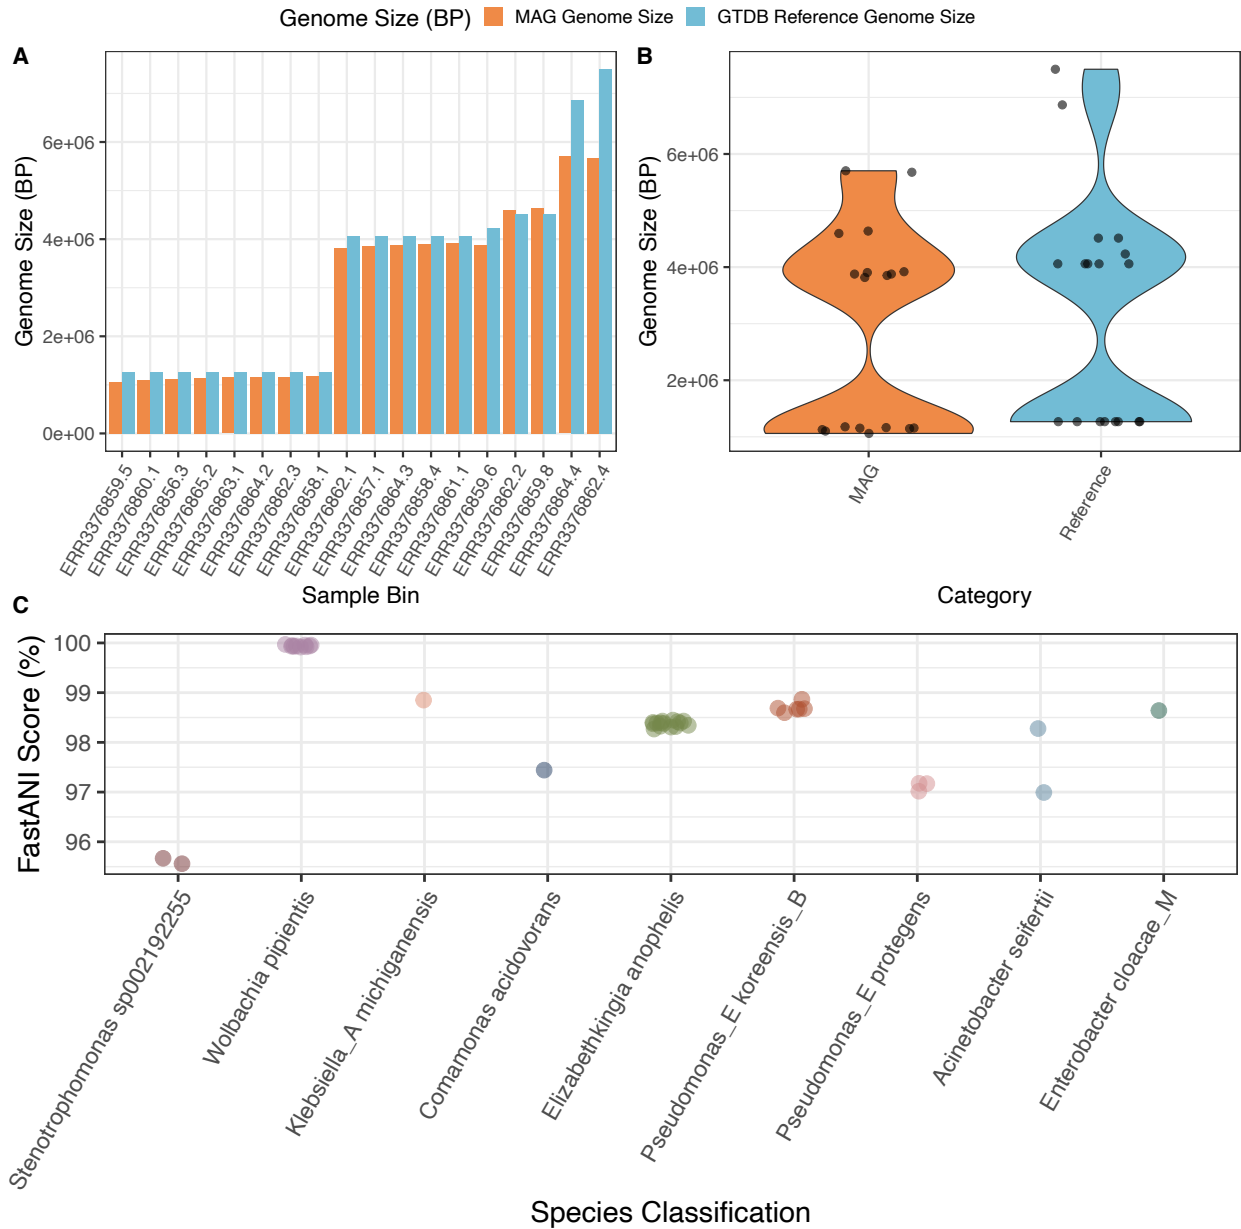

507

508 **Figure 7:** *Ae. aegypti* associated bacterial MAG GTDB-Tk (v1.5.0) classifications **A.** Genome  
 509 size (base pairs) of *Ae. aegypti* associated MAGs (orange) with CheckM completeness >90% and  
 510 <5% contamination compared to genomes size of its closest GTDB-Tk reference genome (blue).  
 511 Each bar denotes the sample originated and the bin number (sample.bin) **B.** Violin plot showing



512 the distribution of *Ae. aegypti* MAG genome size (orange) compared to their GTDB-Tk classified  
513 reference genome. Each point denotes a MAG with completeness >90% and <5% contamination.  
514 C. Taxonomic classifications from the Genome Taxonomy Database (GTDB) of MAGs obtained  
515 from unmapped *Ae. aegypti* reads. X-Axis = GTDB-Tk species classification, Y-Axis = FastANI  
516 (%) score to the closest related reference genome in the GTDB.

517

## 518 **5 Discussion**

519 The analysis of non-host reads from existing WGS data has previously been  
520 applied in other organisms (5,8,9,11). We developed MINUUR to facilitate a  
521 reproducible and robust metagenomic analysis of non-host sequences from  
522 whole genome sequencing data, which can be applied to other hosts at the  
523 user's discretion. For this study, we used MINUUR to characterize the  
524 microbiome of an existing WGS dataset of *Ae. aegypti* mosquitoes (30).

525 Read classifications reveal the high abundance of *Elizabethkingia*,  
526 *Pseudomonas*, *Acinetobacter*, *Stenotrophomonas* and *Wolbachia*. The  
527 presence of *Wolbachia* in these *Ae. aegypti* samples at high titers is  
528 expected as this line was transfected with this bacterium (30). Our species  
529 level classifications support previous amplicon sequencing studies that show  
530 the adult *Ae. aegypti* microbiome is dominated by phyla from Proteobacteria  
531 (*Pseudomonas*, *Acinetobacter*, *Stentrophomonas*, *Enterobacter*, *Klebsiella*)  
532 and Bacteroides (*Elizabethkingia*, *Chryseobacterium*) (18,19,21,25,57). *E.*

533 *anophelis* is an abundant bacterial species identified in this study. This  
534 bacterium has previously been implicated in response to iron fluxes in *An.*  
535 *gambiae* (58), and blood meals in *Ae. albopictus* (59) and *Ae. aegypti* (60).  
536 The high abundance of this symbiont across these samples could be that  
537 DNA was extracted from mosquitoes shortly after blood-feeding, which  
538 would support the previous studies above. Furthermore, studies of mosquito  
539 bacterial interactions show a strain of *E. anophelis*, *E. anophelis Ag1*,  
540 interacts with *Pseudomonas Ag1* by up-regulating expression of the *hemS*  
541 gene in *E. anophelis*, promoting heme breakdown into biliverdin catabolites  
542 (24). Interestingly, *Pseudomonas sp Ag1* is closely related to *P. fluorescens*  
543 (61), identified as an abundant species in our study. Further work should  
544 elucidate if a similar bipartite interaction is present in *Ae. aegypti*.

545 The samples used here originate from a study looking at genetic variation of  
546 artificially selected *Ae. aegypti* for *Wolbachia*-mediated dengue blocking. As  
547 such, we were interested in patterns between microbiome members and low  
548 / high dengue blocking mosquito samples (Figure 3D). We found several  
549 bacteria uniquely identified in high dengue resistant populations. Most  
550 notably, our results support a previous study showing *Pedobacter*  
551 significantly associated with a dengue virus refractory *Ae. aegypti* strain,  
552 MAYO-R (62). *Pedobacter* identified in our study is uniquely present in high

553 dengue blocking mosquito populations, suggesting an association with low  
554 dengue virus titers in *Ae. aegypti*. The mechanism of this association is  
555 unknown but could be due to a specific interaction with dengue virus or  
556 immune priming of *Ae. aegypti* to elicit an anti-viral response (15).

557 HUMANN3 was used to annotate MetaPhlAn3 classified bacteria using the  
558 pan-genome ChocoPhlAn database and UniRef90 annotations. We show  
559 the example of searching for “siderophore” related genes, which resulted in  
560 the identification of 16 genes across 9 bacterial species. The TonB  
561 dependent siderophore receptor was identified across seven / nine bacteria,  
562 suggesting involvement of siderophore mediated iron uptake in *Ae. aegypti*  
563 associated bacteria. However, while the TonB-dependent receptor has high  
564 affinity for siderophores, it is also specific to other substrates including  
565 vitamin B12s, carbohydrates and nickel chelates (63). The “siderophore”  
566 gene profiles reported in this study also suggest different siderophore  
567 acquisition mechanisms across *Ae. aegypti* bacteria (64). For example,  
568 *Klebsiella* identified in this study does not contain the TonB dependent  
569 siderophore receptor, but instead contains a catecholate siderophore  
570 specific receptor *fiu*. A similar observation is noted for *Acinetobacter* which  
571 uniquely contains the Catechol synthase *DhbF*.

572 We assembled 19 high quality MAGs with CheckM completeness scores  
573 >90% and <5% contamination, which were subsequently classified, outside  
574 of MINUUR, against the Genome Taxonomy Database. High-quality MAG  
575 reconstructions are applied in large scale metagenomic studies from  
576 chickens (65), humans (66) to cows (67–69), with these studies yielding  
577 between 400 to 92,000 MAGs per study. We apply a similar approach with  
578 unmapped *Ae. aegypti* sequencing reads to reconstruct high-quality  
579 community accepted standard MAGs. Our study expands the genomic  
580 representation of known mosquito-associated bacterial symbionts,  
581 specifically to *Ae. aegypti*, adding these newly assembled MAGs to the 33-  
582 mosquito associated bacterial genomes currently stored on the NCBI.  
583 Overall, these provide a valuable resource for researchers in the field and  
584 can be used in further work such as facilitating biosynthetic gene cluster  
585 discovery (69) or to identify genetic targets for symbiont pathogen blocking  
586 approaches (13).

587 In summary, we developed a pipeline to facilitate analysis of unmapped  
588 reads from host-associated WGS data, with application in the pathogen  
589 vector *Ae. aegypti*. Future considerations and prospects of mosquito  
590 microbiome research were recently established by the Mosquito Microbiome  
591 Consortium (70). A key point highlighted in this statement is the need for

592 (meta)genomics approaches with solid reproducibility for data analysis within  
593 the field. Our pipeline provides a robust set of analyses to assess non-host  
594 reads from existing genome sequence data. Within *Ae. aegypti*, we show the  
595 reads that do not map to its reference genome can be taxonomically  
596 classified to its microbiome members at genus and species level; associated  
597 microbial genes and pathways predicted and high-quality mosquito-  
598 associated MAGs reconstructed. We hope this pipeline and approach will  
599 facilitate further analysis of existing WGS data within *Ae. aegypti* and other  
600 organisms.

#### 601 Data Availability Statement

602 MAGs are available in GenBank under the project accession number:  
603 [PRJNA866910](#).

#### 604 **Author contributions**

605 AF, EH and GLH conceived the project. AF and EH designed the  
606 methodology. AF performed the analyses and wrote the pipeline. LC  
607 provided technical expertise. EH and GLH provided oversight throughout the  
608 project. AF and EH drafted the manuscript, and all authors contributed to and  
609 approved of the final version.

## 610 **Acknowledgments**

611 AF was supported by a DTP scholarship (Medical Research Council  
612 MR/N013514/1). EH acknowledges funding from Wellcome (217303/Z/19/Z)  
613 and the BBSRC (BB/V011278/1).

## 614 **Bibliography**

- 615 1. Theis KR, Dheilly NM, Klassen JL, Brucker RM, Baines JF, Bosch  
616 TCG, et al. Getting the Hologenome Concept Right: an Eco-  
617 Evolutionary Framework for Hosts and Their Microbiomes. *mSystems*.  
618 2016 Apr 26;1(2). Available from:  
619 <https://journals.asm.org/doi/10.1128/mSystems.00028-16>
- 620 2. Pérez-Cobas AE, Gomez-Valero L, Buchrieser C. Metagenomic  
621 approaches in microbial ecology: an update on whole-genome and  
622 marker gene sequencing analyses. *Microb Genomics*. 6(8). Available  
623 from:  
624 <https://www.microbiologyresearch.org/content/journal/mgen/10.1099/mgen.0.000409>  
625
- 626 3. Knight R, Vrbanac A, Taylor BC, Aksenov A, Callewaert C, Debelius J, et  
627 al. Best practices for analysing microbiomes. *Nat Rev Microbiol*. 2018  
628 Jul;16(7):410–22.
- 629 4. Lapidus AL, Korobeynikov AI. Metagenomic Data Assembly – The Way  
630 of Decoding Unknown Microorganisms. *Front Microbiol*. 2021 Mar  
631 23;12:613791.
- 632 5. Hooper R, Brealey JC, Valk T, Alberdi A, Durban JW, Fearnbach H, et al.  
633 Host-derived population genomics data provides insights into bacterial  
634 and diatom composition of the killer whale skin. *Mol Ecol*. 2019  
635 Jan;28(2):484–502.

- 636 6. Ghanavi HR, Twort VG, Duplouy A. Exploring bycatch diversity of  
637 organisms in whole genome sequencing of Erebidae moths  
638 (*Lepidoptera*). *Sci Rep*. 2021 Dec;11(1):24499.
- 639 7. LaBonte NR, Jacobs J, Ebrahimi A, Lawson S, Woeste K. Data mining  
640 for discovery of endophytic and epiphytic fungal diversity in short-read  
641 genomic data from deciduous trees. *Fungal Ecol*. 2018 Oct;35:1–9.
- 642 8. Salzberg SL, Hotopp JCD, Delcher AL, Pop M, Smith DR, Eisen MB, et  
643 al. Serendipitous discovery of *Wolbachia* genomes in multiple  
644 *Drosophila* species. *Genome Biol*. 2005;8.
- 645 9. Martinson VG, Magoc T, Koch H, Salzberg SL, Moran NA. Genomic  
646 Features of a Bumble Bee Symbiont Reflect Its Host Environment. *Appl*  
647 *Environ Microbiol*. 2014 Jul;80(13):3793–803.
- 648 10. Fierst JL, Murdock DA, Thanthiriwatte C, Willis JH, Phillips PC.  
649 Metagenome-Assembled Draft Genome Sequence of a Novel Microbial  
650 *Stenotrophomonas maltophilia* Strain Isolated from *Caenorhabditis*  
651 *remanei* Tissue. *Genome Announc*. 2017 Feb 16;5(7). Available from:  
652 <https://journals.asm.org/doi/10.1128/genomeA.01646-16>
- 653 11. Gerth M, Hurst GDD. Short reads from honey bee (*Apis* sp.)  
654 sequencing projects reflect microbial associate diversity. *PeerJ*. 2017  
655 Jul 12;5:e3529.
- 656 12. Messina JP, Brady OJ, Pigott DM, Brownstein JS, Hoen AG, Hay SI. A  
657 global compendium of human dengue virus occurrence. *Sci Data*. 2014  
658 Dec;1(1):140004.
- 659 13. Cansado-Utrilla C, Zhao SY, McCall PJ, Coon KL, Hughes GL. The  
660 microbiome and mosquito vectorial capacity: rich potential for discovery  
661 and translation. *Microbiome*. 2021 Dec;9(1):111.
- 662 14. Kozlova EV, Hegde S, Roundy CM, Golovko G, Saldaña MA, Hart CE,  
663 et al. Microbial interactions in the mosquito gut determine *Serratia*  
664 colonization and blood-feeding propensity. *ISME J*. 2021 Jan;15(1):93–  
665 108.
- 666 15. Scolari F, Casiraghi M, Bonizzoni M. *Aedes* spp. and Their Microbiota:  
667 A Review. *Front Microbiol*. 2019 Sep 4;10:2036.



- 668 16. Coon KL, Valzania L, McKinney DA, Vogel KJ, Brown MR, Strand MR.  
669 Bacteria-mediated hypoxia functions as a signal for mosquito  
670 development. *Proc Natl Acad Sci*. 2017 Jul 3;114(27):E5362–9.
- 671 17. Valzania L, Coon KL, Vogel KJ, Brown MR, Strand MR. Hypoxia-  
672 induced transcription factor signaling is essential for larval growth of the  
673 mosquito *Aedes aegypti*. *Proc Natl Acad Sci*. 2018 Jan 16;115(3):457–  
674 65.
- 675 18. Dada N, Jumas-Bilak E, Manguin S, Seidu R, Stenström TA,  
676 Overgaard HJ. Comparative assessment of the bacterial communities  
677 associated with *Aedes aegypti* larvae and water from domestic water  
678 storage containers. *Parasit Vectors*. 2014;7(1):391.
- 679 19. David MR, Santos LMB dos, Vicente ACP, Maciel-de-Freitas R. Effects  
680 of environment, dietary regime and ageing on the dengue vector  
681 microbiota: evidence of a core microbiota throughout *Aedes aegypti*  
682 lifespan. *Mem Inst Oswaldo Cruz*. 2016 Aug 25;111(9):577–87.
- 683 20. Saab SA, Dohna H zu, Nilsson LKJ, Onorati P, Nakhleh J, Terenius O,  
684 et al. The environment and species affect gut bacteria composition in  
685 laboratory co-cultured *Anopheles gambiae* and *Aedes albopictus*  
686 mosquitoes. *Sci Rep*. 2020 Dec;10(1):3352.
- 687 21. Onyango GM, Bialosuknia MS, Payne FA, Mathias N, Ciota TA,  
688 Kramer DL. Increase in temperature enriches heat tolerant taxa in  
689 *Aedes aegypti* midguts. *Sci Rep*. 2020 Dec;10(1):19135.
- 690 22. Kakani P, Gupta L, Kumar S. Heme-Peroxidase 2, a Peroxinectin-Like  
691 Gene, Regulates Bacterial Homeostasis in *Anopheles stephensi*  
692 Midgut. *Front Physiol*. 2020 Sep 8;11:572340.
- 693 23. Minard G, Tran FH, Tran Van V, Fournier C, Potier P, Roiz D, et al.  
694 Shared larval rearing environment, sex, female size and genetic  
695 diversity shape *Ae. albopictus* bacterial microbiota. *PLOS ONE*. 2018  
696 Apr 11;13(4):e0194521.
- 697 24. Ganley JG, D'Ambrosio HK, Shieh M, Derbyshire ER. Coculturing of  
698 Mosquito-Microbiome Bacteria Promotes Heme Degradation in  
699 *Elizabethkingia anophelis*. *ChemBioChem*. 2020 May 4;21(9):1279–84.



- 700 25. Hegde S, Khanipov K, Albayrak L, Golovko G, Pimenova M, Saldaña  
701 MA, et al. Microbiome Interaction Networks and Community Structure  
702 From Laboratory-Reared and Field-Collected *Aedes aegypti*, *Aedes*  
703 *albopictus*, and *Culex quinquefasciatus* Mosquito Vectors. *Front*  
704 *Microbiol.* 2018 Sep 10;9:2160.
- 705 26. Heu K, Romoli O, Schönbeck JC, Ajenoë R, Epelboin Y, Kircher V, et  
706 al. The Effect of Secondary Metabolites Produced by *Serratia*  
707 *marcescens* on *Aedes aegypti* and Its Microbiota. *Front Microbiol.* 2021  
708 Jul 7;12:645701.
- 709 27. Mitri C, Bischoff E, Belda Cuesta E, Volant S, Ghoulane A, Eiglmeier K,  
710 et al. Leucine-Rich Immune Factor APL1 Is Associated With Specific  
711 Modulation of Enteric Microbiome Taxa in the Asian Malaria Mosquito  
712 *Anopheles stephensi*. *Front Microbiol.* 2020 Feb 26;11:306.
- 713 28. Chen C, Compton A, Nikolouli K, Wang A, Aryan A, Sharma A, et al.  
714 Marker-assisted mapping enables effective forward genetic analysis in  
715 the arboviral vector *Aedes aegypti*, a species with vast recombination  
716 deserts. *Genetics*; 2021 Apr.
- 717 29. Crava C, Varghese FS, Pischedda E, Halbach R, Palatini U,  
718 Marconcini M, et al. Immunity to infections in arboviral vectors by  
719 integrated viral sequences: an evolutionary perspective . *Evolutionary*  
720 *Biology*; 2020 Apr
- 721 30. Ford SA, Allen SL, Ohm JR, Sigle LT, Sebastian A, Albert I, et al.  
722 Selection on *Aedes aegypti* alters *Wolbachia*-mediated dengue virus  
723 blocking and fitness. *Nat Microbiol.* 2019 Nov;4(11):1832–9.
- 724 31. Faucon F, Dusfour I, Gaude T, Navratil V, Boyer F, Chandre F, et al.  
725 Identifying genomic changes associated with insecticide resistance in  
726 the dengue mosquito *Aedes aegypti* by deep targeted sequencing.  
727 *Genome Res.* 2015 Sep;25(9):1347–59.
- 728 32. The *Anopheles gambiae* 1000 Genomes Consortium. Genome  
729 variation and population structure among 1142 mosquitoes of the  
730 African malaria vector species *Anopheles gambiae* and *Anopheles*  
731 *coluzzii*. *Genome Res.* 2020 Oct;30(10):1533–46.
- 732 33. Köster M. Sustainable data analysis with Snakemake. *F1000Research.*  
733 2022 Apr 21;10(33). Available from:

- 734 <https://f1000researchdata.s3.amazonaws.com/manuscripts/56004/06e>  
735 [bda8f-ff09-4b68-a0e1-c12c245aca3b\\_29032\\_-](https://f1000researchdata.s3.amazonaws.com/manuscripts/56004/06ebda8f-ff09-4b68-a0e1-c12c245aca3b_29032_-_johannes_koster_v2.pdf?doi=10.12688/f1000research.29032.2&numberOfBrowsableCollections=55&numberOfBrowsableInstitutionalCollections=4&numberOfBrowsableGateways=40)  
736 [\\_johannes\\_koster\\_v2.pdf?doi=10.12688/f1000research.29032.2&numb](https://f1000researchdata.s3.amazonaws.com/manuscripts/56004/06ebda8f-ff09-4b68-a0e1-c12c245aca3b_29032_-_johannes_koster_v2.pdf?doi=10.12688/f1000research.29032.2&numberOfBrowsableCollections=55&numberOfBrowsableInstitutionalCollections=4&numberOfBrowsableGateways=40)  
737 [erOfBrowsableCollections=55&numberOfBrowsableInstitutionalCollecti](https://f1000researchdata.s3.amazonaws.com/manuscripts/56004/06ebda8f-ff09-4b68-a0e1-c12c245aca3b_29032_-_johannes_koster_v2.pdf?doi=10.12688/f1000research.29032.2&numberOfBrowsableCollections=55&numberOfBrowsableInstitutionalCollections=4&numberOfBrowsableGateways=40)  
738 [ons=4&numberOfBrowsableGateways=40](https://f1000researchdata.s3.amazonaws.com/manuscripts/56004/06ebda8f-ff09-4b68-a0e1-c12c245aca3b_29032_-_johannes_koster_v2.pdf?doi=10.12688/f1000research.29032.2&numberOfBrowsableCollections=55&numberOfBrowsableInstitutionalCollections=4&numberOfBrowsableGateways=40)
- 739 34. Langmead B, Salzberg SL. Fast gapped-read alignment with Bowtie 2.  
740 *Nat Methods*. 2012 Apr;9(4):357–9.
- 741 35. Lu J, Salzberg SL. Ultrafast and accurate 16S rRNA microbial  
742 community analysis using Kraken 2. *Microbiome*. 2020 Dec;8(1):124.
- 743 36. Lu J, Breitwieser FP, Thielen P, Salzberg SL. Bracken: estimating  
744 species abundance in metagenomics data. *PeerJ Comput Sci*. 2017  
745 Jan 2;3:e104.
- 746 37. MetaPhlan2 for enhanced metagenomic taxonomic profiling. *Nature*  
747 *Methods*. 12, 902-903. 2015 Sep 29. Available from:  
748 <https://www.nature.com/articles/nmeth.3589>.
- 749 38. Beghini F, McIver LJ, Blanco-Míguez A, Dubois L, Asnicar F, Maharjan  
750 S, et al. Integrating taxonomic, functional, and strain-level profiling of  
751 diverse microbial communities with bioBakery 3. *eLife*. 2021 May  
752 4;10:e65088.
- 753 39. Suzek BE, Wang Y, Huang H, McGarvey PB, Wu CH, the UniProt  
754 Consortium. UniRef clusters: a comprehensive and scalable alternative  
755 for improving sequence similarity searches. *Bioinformatics*. 2015 Mar  
756 15;31(6):926–32.
- 757 40. Andrew, S A S. FASTQC: A Quality Control Tool for High Throughput  
758 Sequence Data. Available from:  
759 [www.bioinformatics.babraham.ac.uk/projects/fastqc/](http://www.bioinformatics.babraham.ac.uk/projects/fastqc/)
- 760 41. Martin M. Cutadapt removes adapter sequences from high-throughput  
761 sequencing reads. *EMBnet Journal*. 2011 Aug 02; 17, 10-12.
- 762 42. Valiente-Mullor C, Beamud B, Ansari I, Francés-Cuesta C, García-  
763 González N, Mejía L, et al. One is not enough: On the effects of  
764 reference genome for the mapping and subsequent analyses of short-  
765 reads. *PLOS Comput Biol*. 2021 Jan 27;17(1):e1008678.

- 766 43. Li H, Handsaker B, Wysoker A, Fennell T, Ruan J, Homer N, et al. The  
767 Sequence Alignment/Map format and SAMtools. *Bioinformatics*. 2009  
768 Aug 15;25(16):2078–9.
- 769 44. Quinlan AR, Hall IM. BEDTools: a flexible suite of utilities for comparing  
770 genomic features. *Bioinformatics*. 2010 Mar 15;26(6):841–2.
- 771 45. Li D, Liu CM, Luo R, Sadakane K, Lam TW. MEGAHIT: an ultra-fast  
772 single-node solution for large and complex metagenomics assembly via  
773 succinct de Bruijn graph. *Bioinformatics*. 2015 May 15;31(10):1674–6.
- 774 46. Gurevich A, Saveliev V, Vyahhi N, Tesler G. QUAST: quality  
775 assessment tool for genome assemblies. *Bioinformatics*. 2013 Apr  
776 15;29(8):1072–5.
- 777 47. Li H, Durbin R. Fast and accurate short read alignment with Burrows-  
778 Wheeler transform. *Bioinformatics*. 2009 Jul 15;25(14):1754–60.
- 779 48. Kang DD, Li F, Kirton E, Thomas A, Egan R, An H, et al. MetaBAT2: an  
780 adaptive binning algorithm for robust and efficient genome  
781 reconstruction from metagenome assemblies. *PeerJ*. 2019 Jul  
782 26;7:e7359.
- 783 49. Parks DH, Imelfort M, Skennerton CT, Hugenholtz P, Tyson GW.  
784 CheckM: assessing the quality of microbial genomes recovered from  
785 isolates, single cells, and metagenomes. *Genome Res*. 2015  
786 Jul;25(7):1043–55.
- 787 50. Chaumeil PA, Mussig AJ, Hugenholtz P, Parks DH. GTDB-Tk: a toolkit  
788 to classify genomes with the Genome Taxonomy Database.  
789 *Bioinformatics*. 2019 Nov 15;26(6):1925-1927.
- 790 51. Hyatt D, Chen GL, LoCascio PF, Land ML, Larimer FW, Hauser LJ.  
791 Prodigal: prokaryotic gene recognition and translation initiation site  
792 identification. *BMC Bioinformatics*. 2010 Dec;11(1):119.
- 793 52. Finn RD, Clements J, Eddy SR. HMMER web server: interactive  
794 sequence similarity searching. *Nucleic Acids Res*. 2011 Jul 1;39:W29–  
795 37.
- 796 53. Parks DH, Chuvochina M, Waite DW, Rinke C, Skarszewski A,  
797 Chaumeil PA, et al. A standardized bacterial taxonomy based on

- 798 genome phylogeny substantially revises the tree of life. *Nat Biotechnol.*  
799 2018 Nov;36(10):996–1004.
- 800 54. Matsen FA, Kodner RB, Armbrust EV. pplacer: linear time maximum-  
801 likelihood and Bayesian phylogenetic placement of sequences onto a  
802 fixed reference tree. *BMC Bioinformatics.* 2010 Dec;11(1):538.
- 803 55. Ganley JG, Pandey A, Sylvester K, Lu KY, Toro-Moreno M, Rütshlin  
804 S, et al. A Systematic Analysis of Mosquito-Microbiome Biosynthetic  
805 Gene Clusters Reveals Antimalarial Siderophores that Reduce  
806 Mosquito Reproduction Capacity. *Cell Chem Biol.* 2020 Jul;27(7):817-  
807 826.e5.
- 808 56. The Genome Standards Consortium, Bowers RM, Kyrpides NC,  
809 Stepanauskas R, Harmon-Smith M, Doud D, et al. Minimum  
810 information about a single amplified genome (MISAG) and a  
811 metagenome-assembled genome (MIMAG) of bacteria and archaea.  
812 *Nat Biotechnol.* 2017 Aug;35(8):725–31.
- 813 57. Mancini MV, Damiani C, Accoti A, Tallarita M, Nunzi E, Cappelli A, et  
814 al. Estimating bacteria diversity in different organs of nine species of  
815 mosquito by next generation sequencing. *BMC Microbiol.* 2018  
816 Dec;18(1):126.
- 817 58. Chen S, Johnson BK, Yu T, Nelson BN, Walker ED. *Elizabethkingia*  
818 *anophelis*: Physiologic and Transcriptomic Responses to Iron Stress.  
819 *Front Microbiol.* 2020 May 7;11:804.
- 820 59. Chen S, Zhang D, Augustinos A, Doudoumis V, Bel Mokhtar N, Maiga  
821 H, et al. Multiple Factors Determine the Structure of Bacterial  
822 Communities Associated With *Aedes albopictus* Under Artificial  
823 Rearing Conditions. *Front Microbiol.* 2020 Apr 15;11:605.
- 824 60. Muturi EJ, Dunlap C, Ramirez JL, Rooney AP, Kim CH. Host blood  
825 meal source has a strong impact on gut microbiota of *Aedes aegypti*.  
826 *FEMS Microbiol Ecol.* 2018 Oct 24; Available from:  
827 [https://academic.oup.com/femsec/advance-](https://academic.oup.com/femsec/advance-article/doi/10.1093/femsec/fiy213/5144212)  
828 [article/doi/10.1093/femsec/fiy213/5144212](https://academic.oup.com/femsec/advance-article/doi/10.1093/femsec/fiy213/5144212)
- 829 61. Alvarez C, Kukutla P, Jiang J, Yu W, Xu J. Draft Genome Sequence of  
830 *Pseudomonas sp.* Strain Ag1, Isolated from the Midgut of the Malaria

- 831 Mosquito *Anopheles gambiae*. J Bacteriol. 2012 Oct;194(19):5449–  
832 5449.
- 833 62. Charan SS, Pawar KD, Severson DW, Patole MS, Shouche YS.  
834 Comparative analysis of midgut bacterial communities of *Aedes aegypti*  
835 mosquito strains varying in vector competence to dengue virus.  
836 Parasitol Res. 2013 Jul;112(7):2627–37.
- 837 63. Fujita M, Mori K, Hara H, Hishiyama S, Kamimura N, Masai E. A TonB-  
838 dependent receptor constitutes the outer membrane transport system  
839 for a lignin-derived aromatic compound. Commun Biol. 2019  
840 Dec;2(1):432.
- 841 64. Kramer J, Özkaya Ö, Kümmerli R. Bacterial siderophores in community  
842 and host interactions. Nat Rev Microbiol. 2020 Mar;18(3):152–63.
- 843 65. Glendinning L, Stewart RD, Pallen MJ, Watson KA, Watson M.  
844 Assembly of hundreds of novel bacterial genomes from the chicken  
845 caecum. Genome Biol. 2020 Dec;21(1):34.
- 846 66. Almeida A, Mitchell AL, Boland M, Forster SC, Gloor GB, Tarkowska A,  
847 et al. A new genomic blueprint of the human gut microbiota. Nature.  
848 2019 Apr 25;568(7753):499–504.
- 849 67. Wilkinson T, Korir D, Ogugo M, Stewart RD, Watson M, Paxton E, et al.  
850 1200 high-quality metagenome-assembled genomes from the rumen of  
851 African cattle and their relevance in the context of sub-optimal feeding.  
852 Genome Biol. 2020 Dec;21(1):229.
- 853 68. Watson M. New insights from 33,813 publicly available metagenome-  
854 assembled-genomes (MAGs) assembled from the rumen microbiome.  
855 Microbiology; 2021 Apr.
- 856 69. Stewart RD, Auffret MD, Warr A, Wisner AH, Press MO, Langford KW,  
857 et al. Assembly of 913 microbial genomes from metagenomic  
858 sequencing of the cow rumen. Nat Commun. 2018 Dec;9(1):870.
- 859 70. Dada N, Jupatanakul N, Minard G, Short SM, Akorli J, Villegas LM.  
860 Considerations for mosquito microbiome research from the Mosquito  
861 Microbiome Consortium. Open Science Framework; 2020 Jun.  
862 Available from: <https://osf.io/2s8he>
